# Supplementary material for: Effects of mating-type ratio imbalance on the degeneration of Cordyceps militaris subculture and preventative measures
Source: PeerJ. 2024 Jul 9;12:e17648. doi: 10.7717/peerj.17648 (PMC11243967; doi:10.7717/peerj.17648)
Supplement: Data S1 — The fruiting biological transformation efficiency and dry weights of the six strains, dry weight of the fruiting body of Cordyceps militaris by the subculture of double mating-type mycelia, dry weight of the fruiting body of Cordyceps militaris by the subculture of single mating-type mycelia, and a comparison of fruiting body yield of strains with different proportions of mating type. [file peerj-12-17648-s002.xlsx]

## Sheet: Table1
Table1. The Fruiting biological efficiency and dry weights of the six strains
	Fresh weight (g)	Dry weight (g)	Biological efficiency (%)
xf-1	34.98	6.39	1.166
	36.99	7.25	1.233
	39.12	7.24	1.304
jyt-1	37.24	6.97	1.24133
	36.44	8.17	1.21467
	33.81	5.66	1.127
ms-1	36.27	7.18	1.209
	42.26	7.6	1.40867
	44.27	7.73	1.47567
xm-1	33.89	6.93	1.12967
	39.72	7.36	1.324
	37.16	7.12	1.23867
jb-1	37.53	8.34	1.251
	44.59	8.38	1.48633
	45.63	8.87	1.521
jb-2	41.78	9.03	1.39267
	40.08	8.67	1.336
	39.97	7.64	1.33233
Note: The data unit in the table is g

## Sheet: Table3
Table 3. Dry weight of the fruiting body of Cordyceps militaris by the subculture of double mating-type mycelia
strain generations	1	3	5	7	9	11
xf-1	4.42	3.81
	4.68	1.9
	5.52	2.87
jyt-1	6	4.61	6.07	4.09	2.35
	3.32	3.03	4.92	4.59	2
	4.03	3.01	5.63	2.61	2.7
ms-1	6.07	6.96	6.29	5.6	4.41	6
	6.99	6.7	6.39	5.28	5.47	5.59
	6.53	6.34	6.98	6.31	5.9	6.71
xm-1	2.99	5.14	5.43	4.43	2.27
	3.08	5.28	4.47	3.47	1.81
	2.73	3.84	3.46	3.46	2.24
jb-1	8	8.34	8.34	3.88	2.06
	8	8.38	8.77	5.06	2.52
	9	8.87	7.98	2.81	2.29
Jb-2	6.53	6.73	8.78	7.92	8.97	7.98
	6.64	8.3	7.23	5.94	9.21	6.21
	6.42	7.57	9.41	6.43	9.02	9.02
Note: The data unit in the table is g

## Sheet: Table4
Table 4. Dry weight of the fruiting body of Cordyceps militaris by the subculture of single mating-type mycelia
strain generations	1	3	5	7	9	11
xf-1	4.66	3.98	2.81	4.27	5.47	4.29
	3.68	4.46	4.37	4.05	4.74	4.35
	3.22	4.94	2.69	5.08	3.25	5.14
jyt-1	5.75	4.74	4.79	5.98	5.62	4.3
	5.78	6.53	4.78	6.97	5.46	5.25
	8.17	3.44	5.66	6.8	6.26	5.91
ms-1	5.43	4	6.43	4.95	4.25	4.47
	5.54	4.19	6.07	4.95	4.45	5.62
	5.1	3.91	5.22	4.12	4.82	5.09
xm-1	6.37	5.82	5.55	4.7	4.3	4.39
	5.09	5.17	6.12	4.9	4	4.33
	5.73	5.99	6.18	5.3	4	4.01
jb-1	8.18	5.73	6.37	6.22	5.67	2.96
	6.91	6.83	7.51	5.68	5.96	2.85
	8.3	6.07	6.01	6.1	6.25	2.29
Jb-2	11.73	11.36	8.62	9.31	8.91	9.08
	9.67	9.78	9.1	9.53	8.84	10.54
	9.98	10.51	10.63	8.34	8.16	8.72
Note: The data unit in the table is g

## Sheet: Figure2
Comparison of fruiting body yield of strains with different proportions of mating type
proportion strain	1:9	2:8	3：7	4:6	5:5	6:4	7:3	8:2	9:1
xf-1	6.02	6.05	5.08	5.19	5.31	4.38	4.37	4.1	3.61
	6.27	4.98	5.77	5.2	4.99	5.2	4.21	4.83	3.74
	6.25	5.95	4.86	5.65	5.32	4.79	4.51	4.77	4.18
jyt-1	4.81	5.11	6.22	4.12	3.18	3.27	3.78	2.54	3.59
	4.42	4	4.16	3.37	2.98	3.31	4.57	4	3.99
	4.62	4	5.39	4.54	2.99	3	2.91	3	3.64
ms-1	3.12	3.1	3.09	3.44	3.68	4.87	3.44	4.36	4.37
	4.16	5.19	3.52	3.56	5.42	4.55	5.05	4.96	4
	3.73	3.71	3.31	3.67	4.64	5	3.61	3.71	4
xm-1	5.28	5.79	5.92	5.96	6.54	5.73	5.93	5.78	4.97
	5.86	5.35	7.5	6.08	6.1	5.65	5.19	5.86	5.46
	6.29	5.28	4.88	5.52	6.32	5.44	5.56	6.61	5.73
jb-1	6.54	6.37	7.52	7.92	6.81	7.75	7.48	7.48	7.98
	7.32	6.75	6.08	7.82	7.08	6.37	7.35	7.76	7.37
	6.67	4.87	6.36	7.37	6.43	7.4	7.55	7.3	7.28
Note: The data unit in the table is g
